# Supplementary material
Source: PubMed Central journal article supplement (PMC3848418)

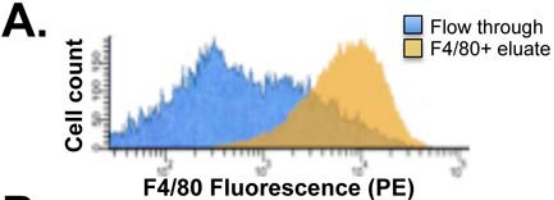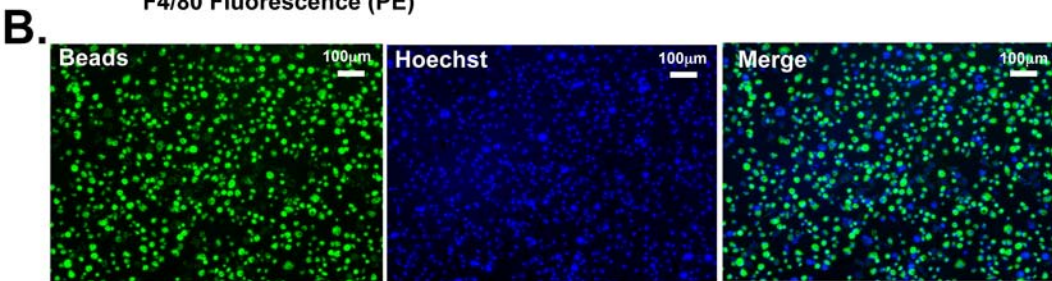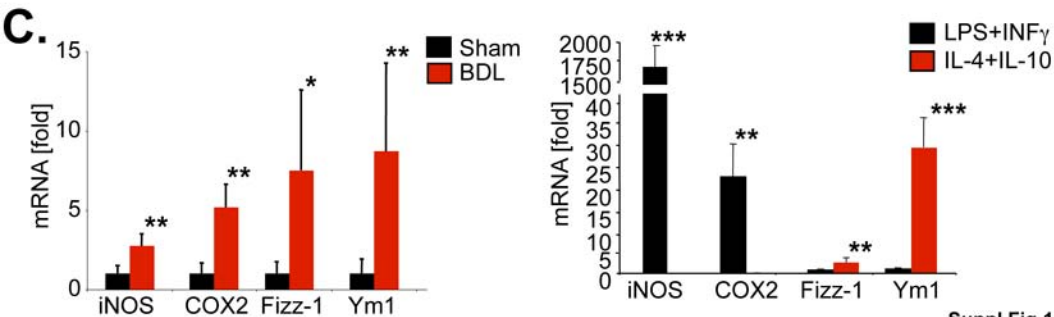

**A.**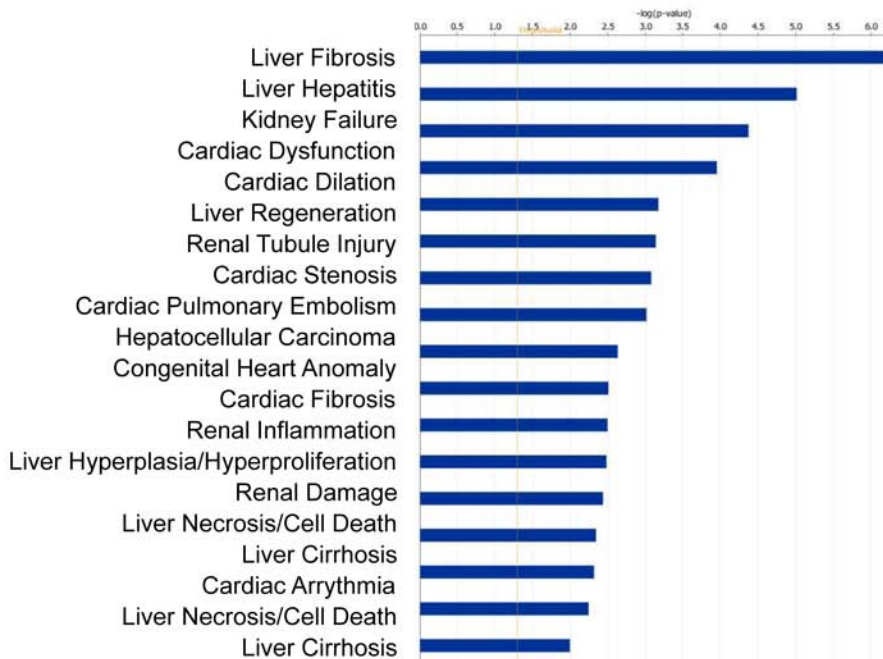**B.**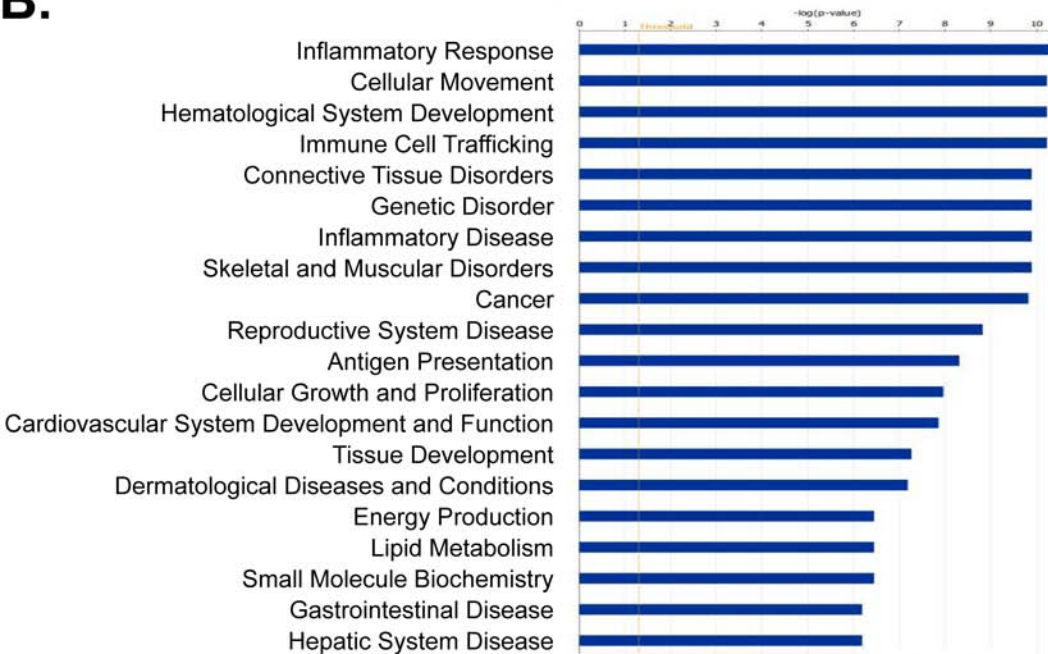

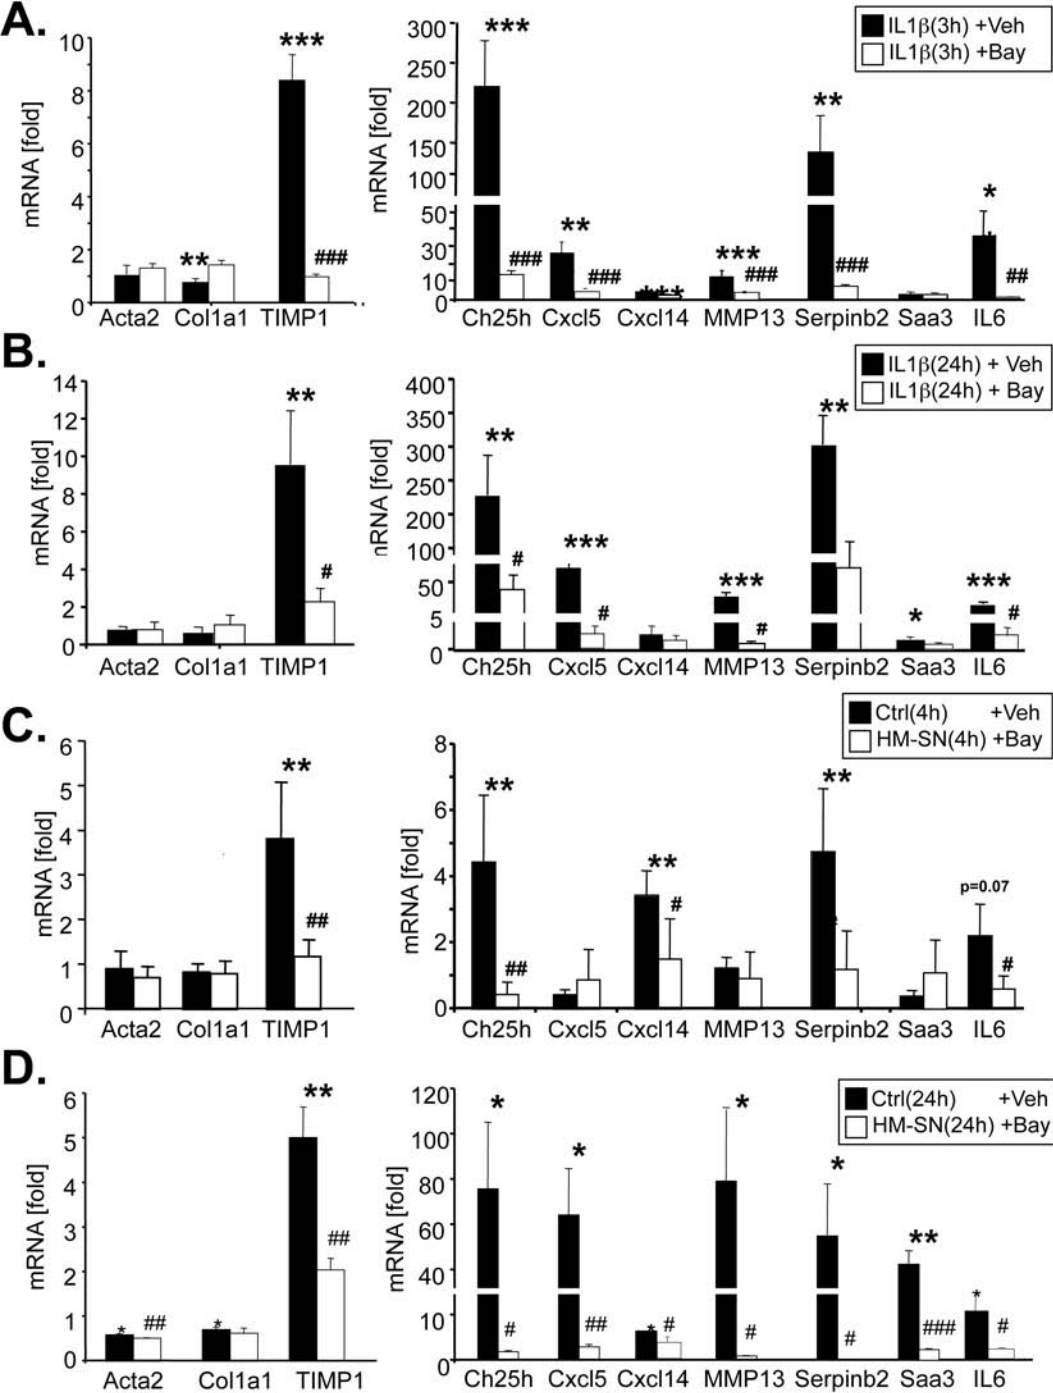

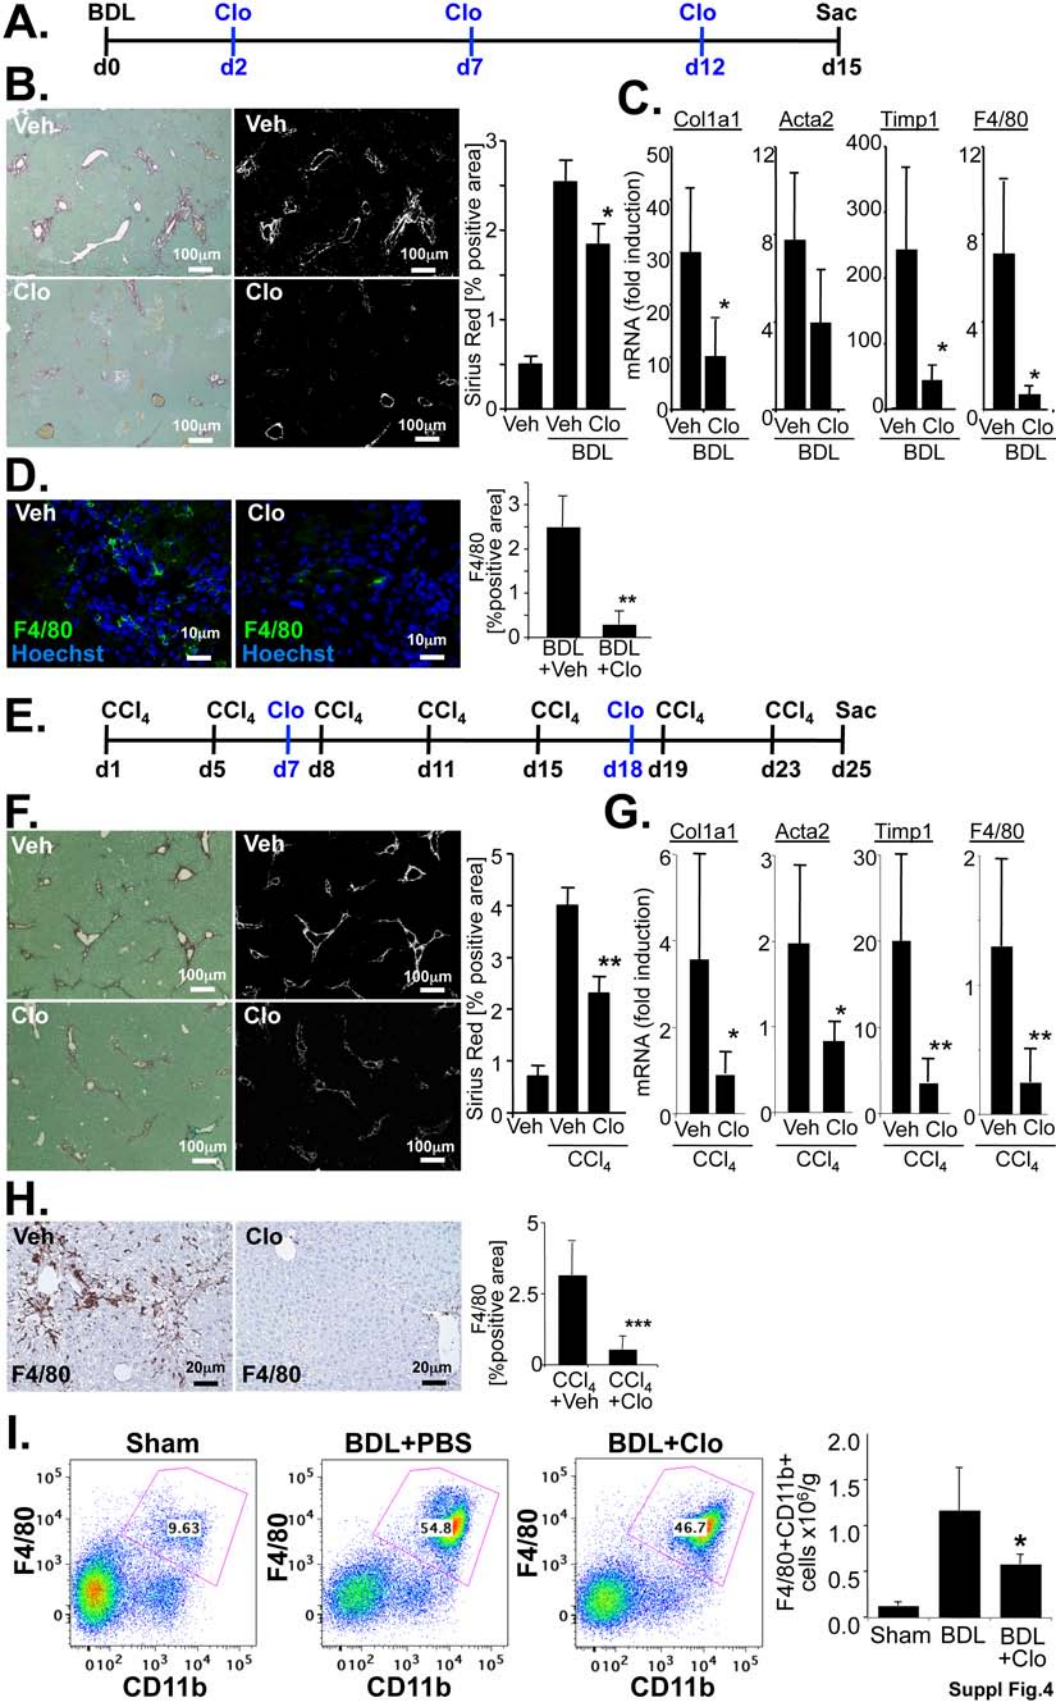

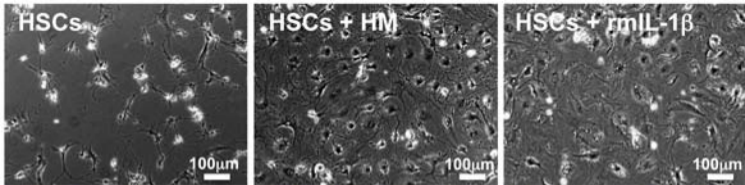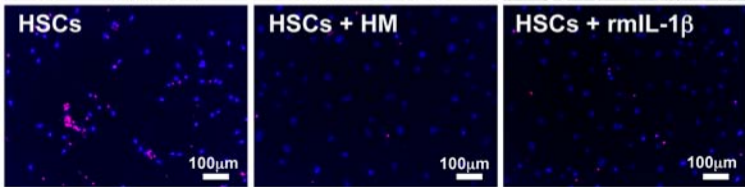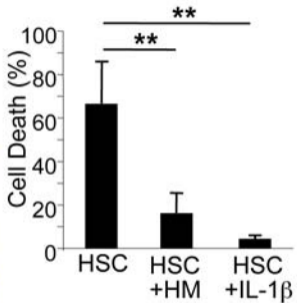

Suppl Fig.5

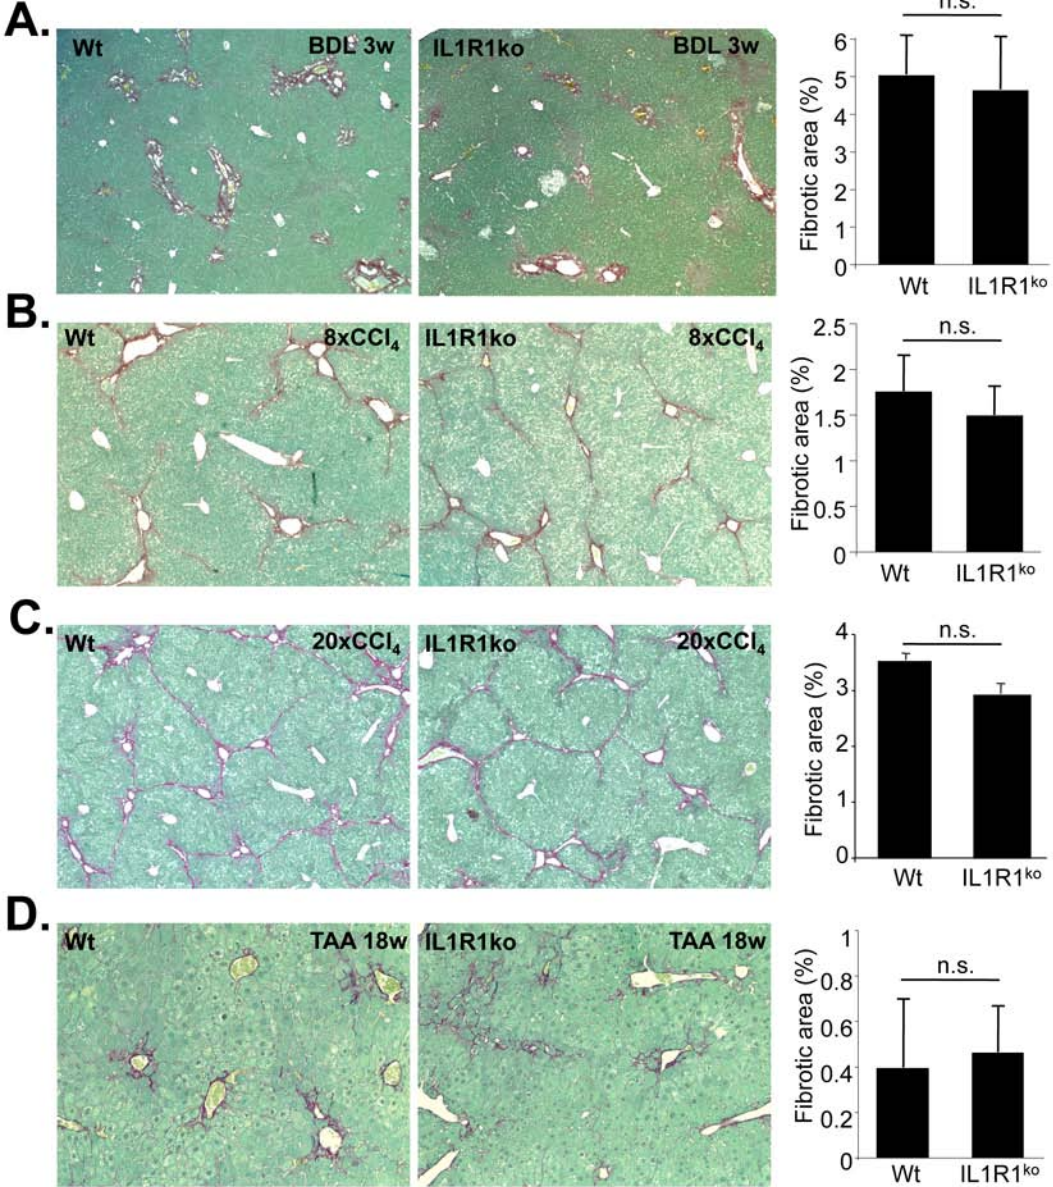

**A.**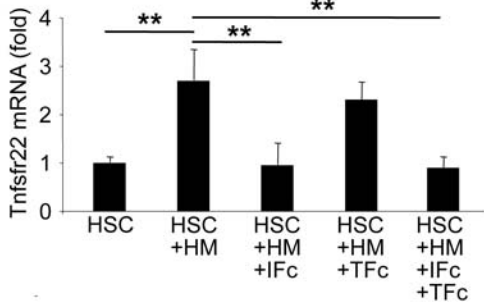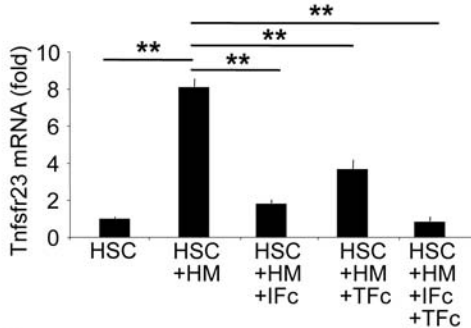**B.**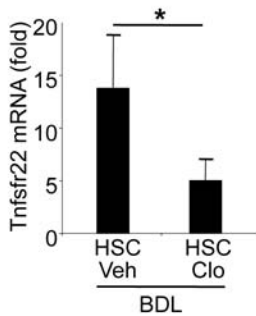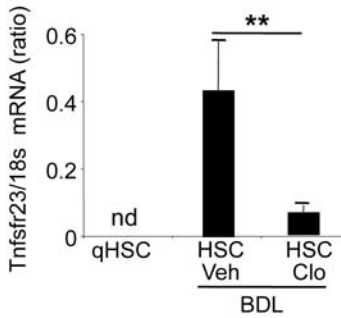

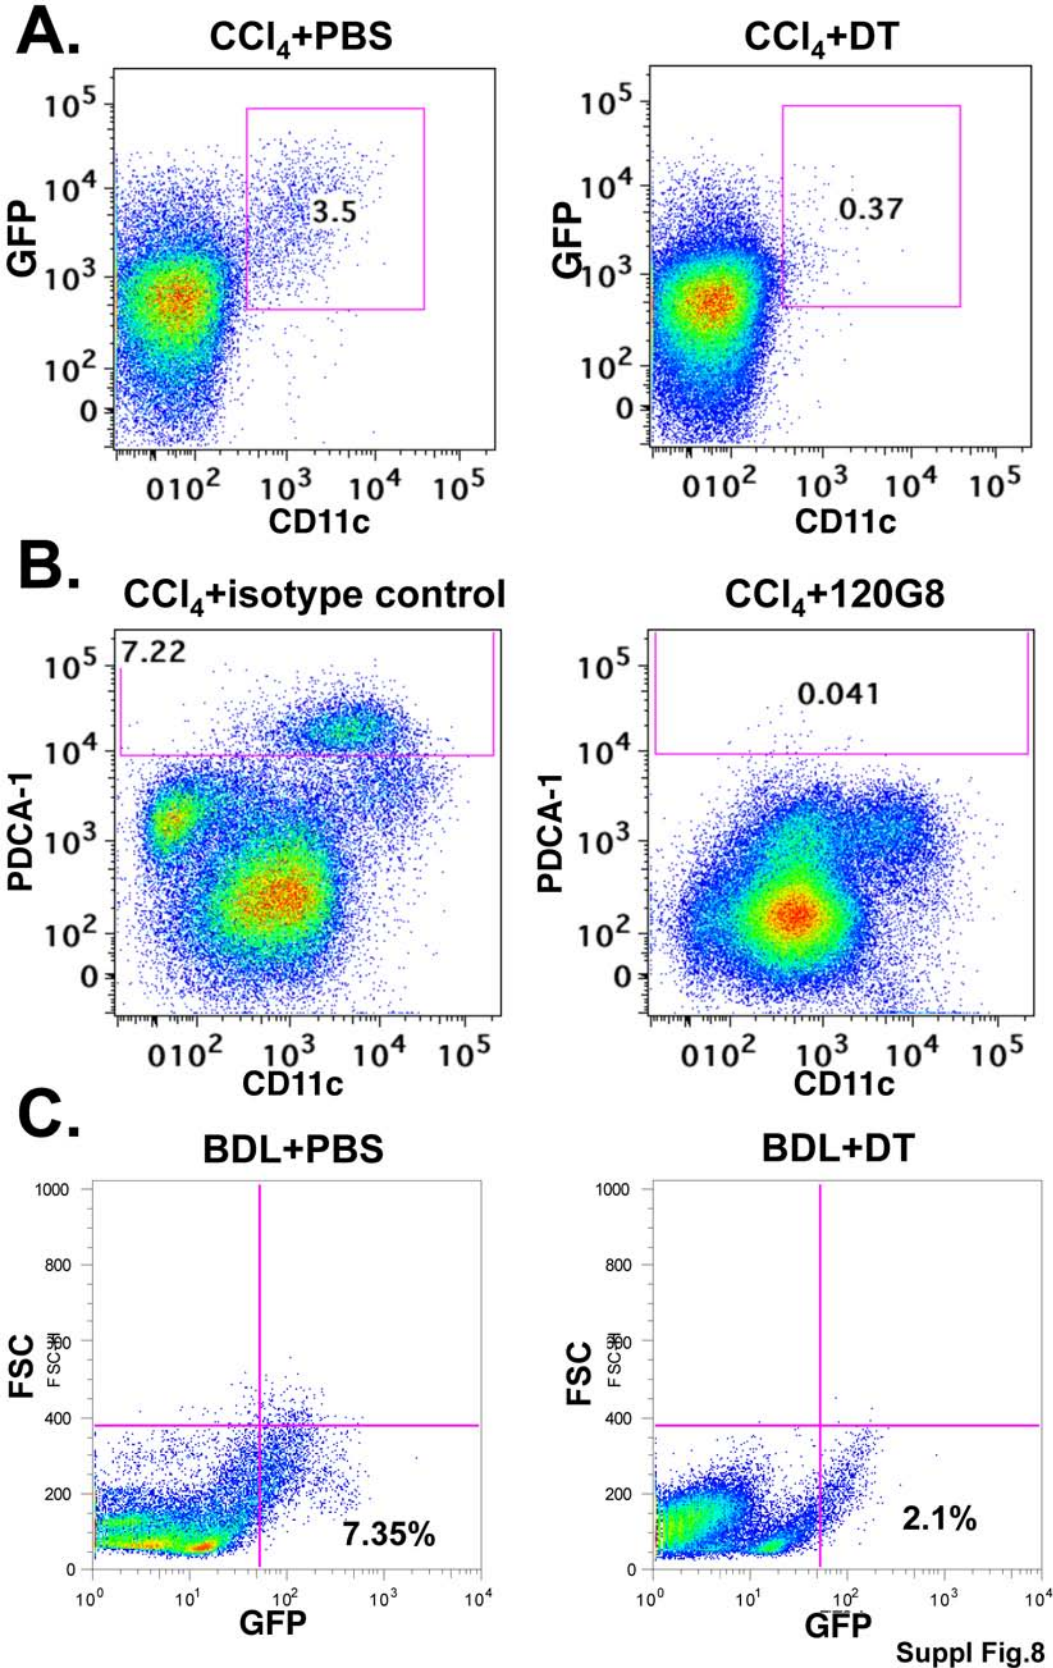



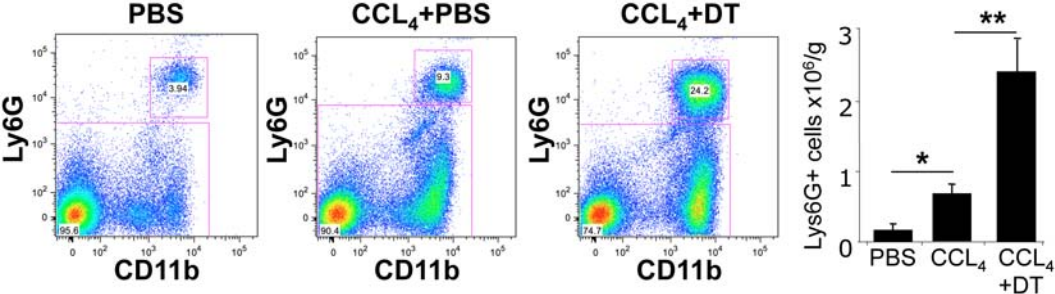

Suppl Fig.9

Supplement: NIHMS462209-supplement-Supp_Fig_S1-S9.pdf [file NIHMS462209-supplement-Supp_Fig_S1-S9.pdf]
